# Supplementary material for: Longitudinal TprK profiling of in vivo and in vitro-propagated Treponema pallidum subsp. pallidum reveals accumulation of antigenic variants in absence of immune pressure
Source: PubMed Central journal article supplement (PMC8480903; doi:10.1371/journal.pntd.0009753), 2021-09-07

# 7391 – Immunocompetent

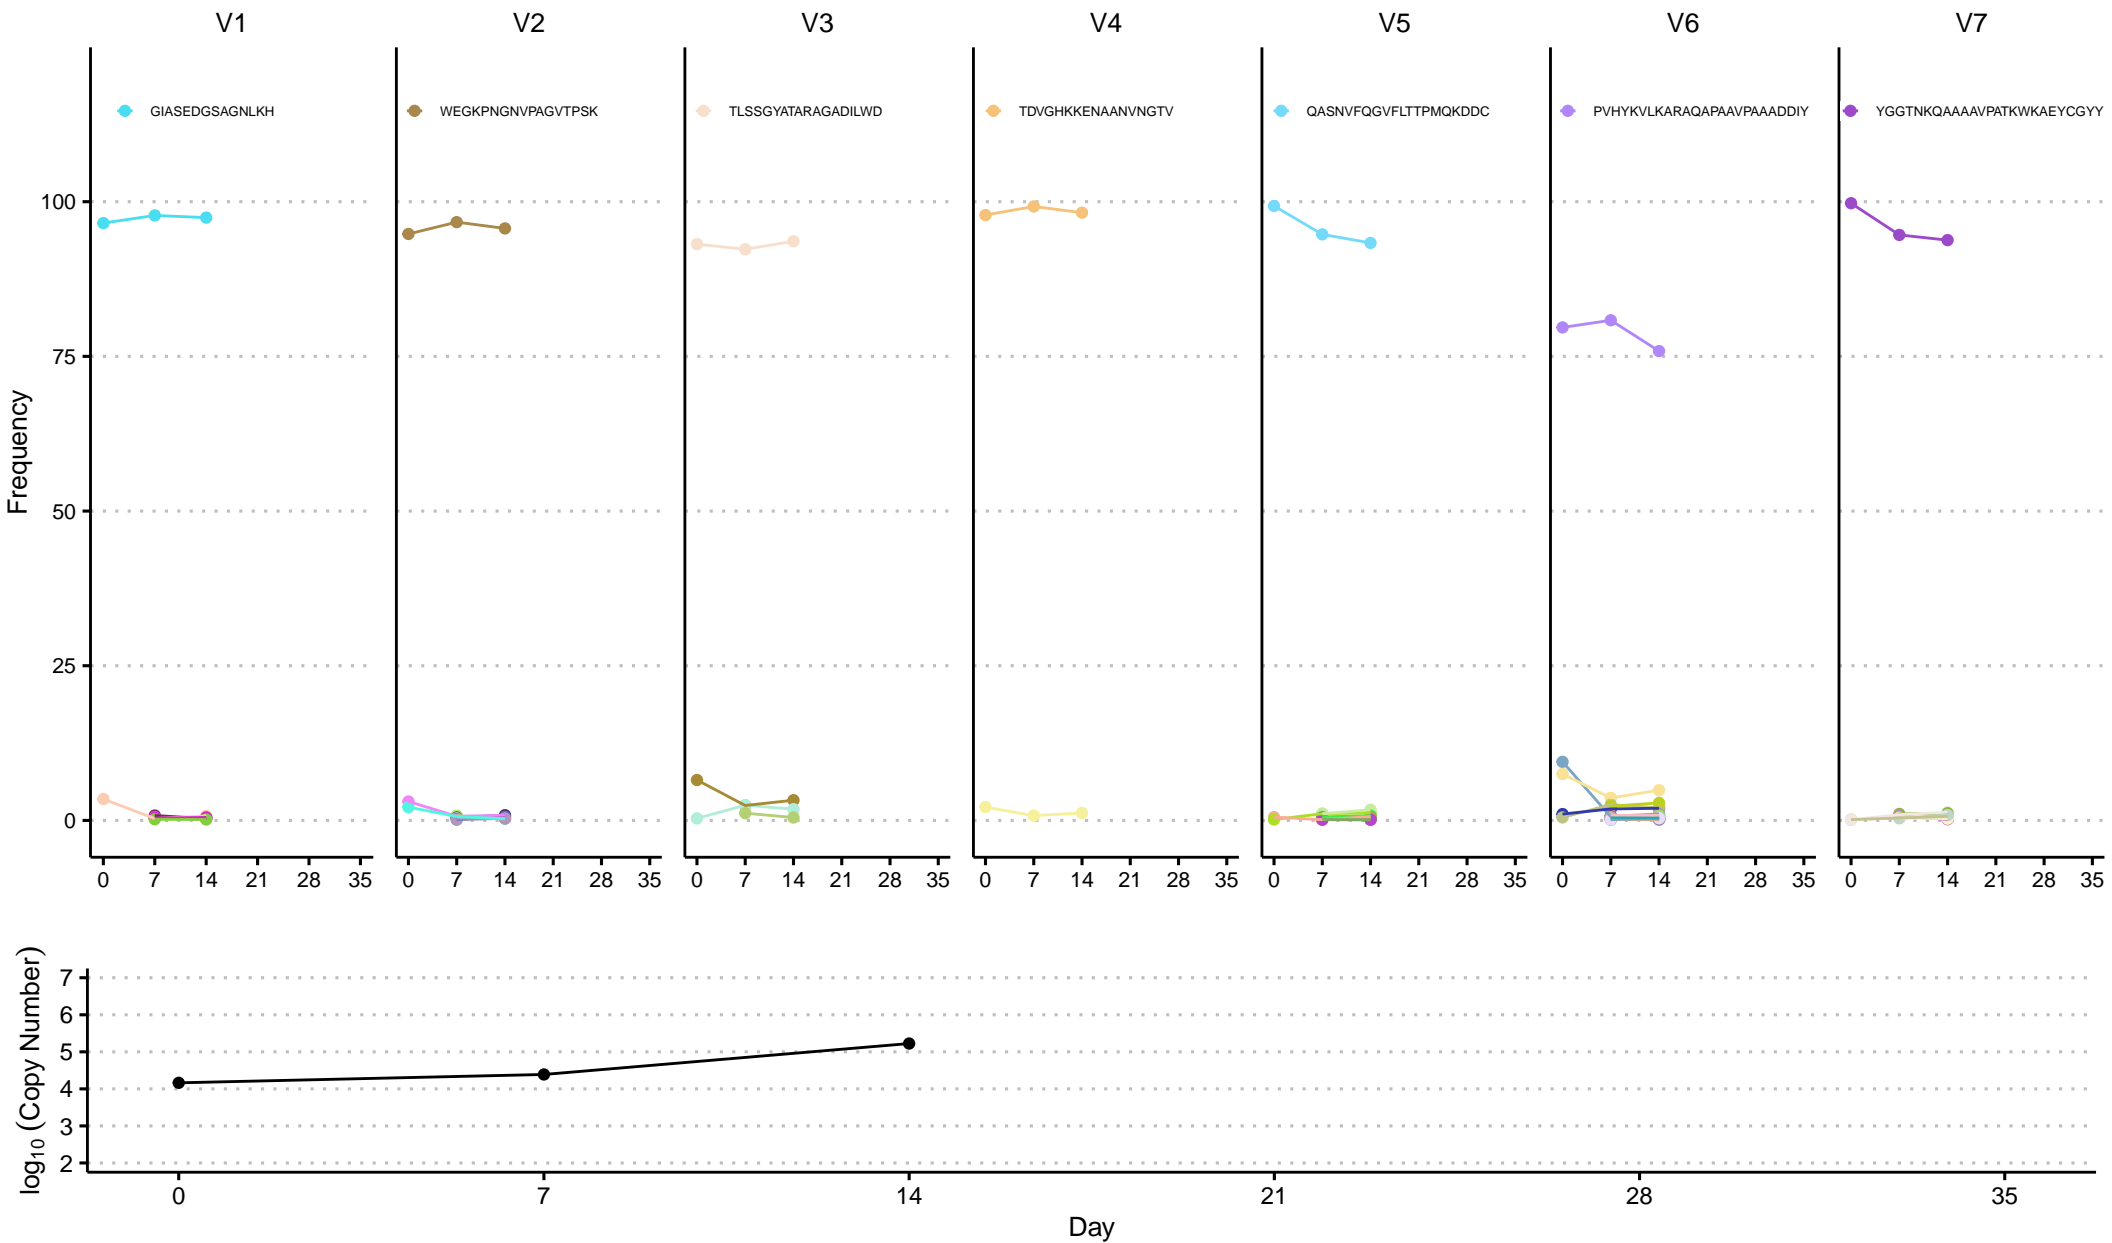

# 7396 – Immunocompetent

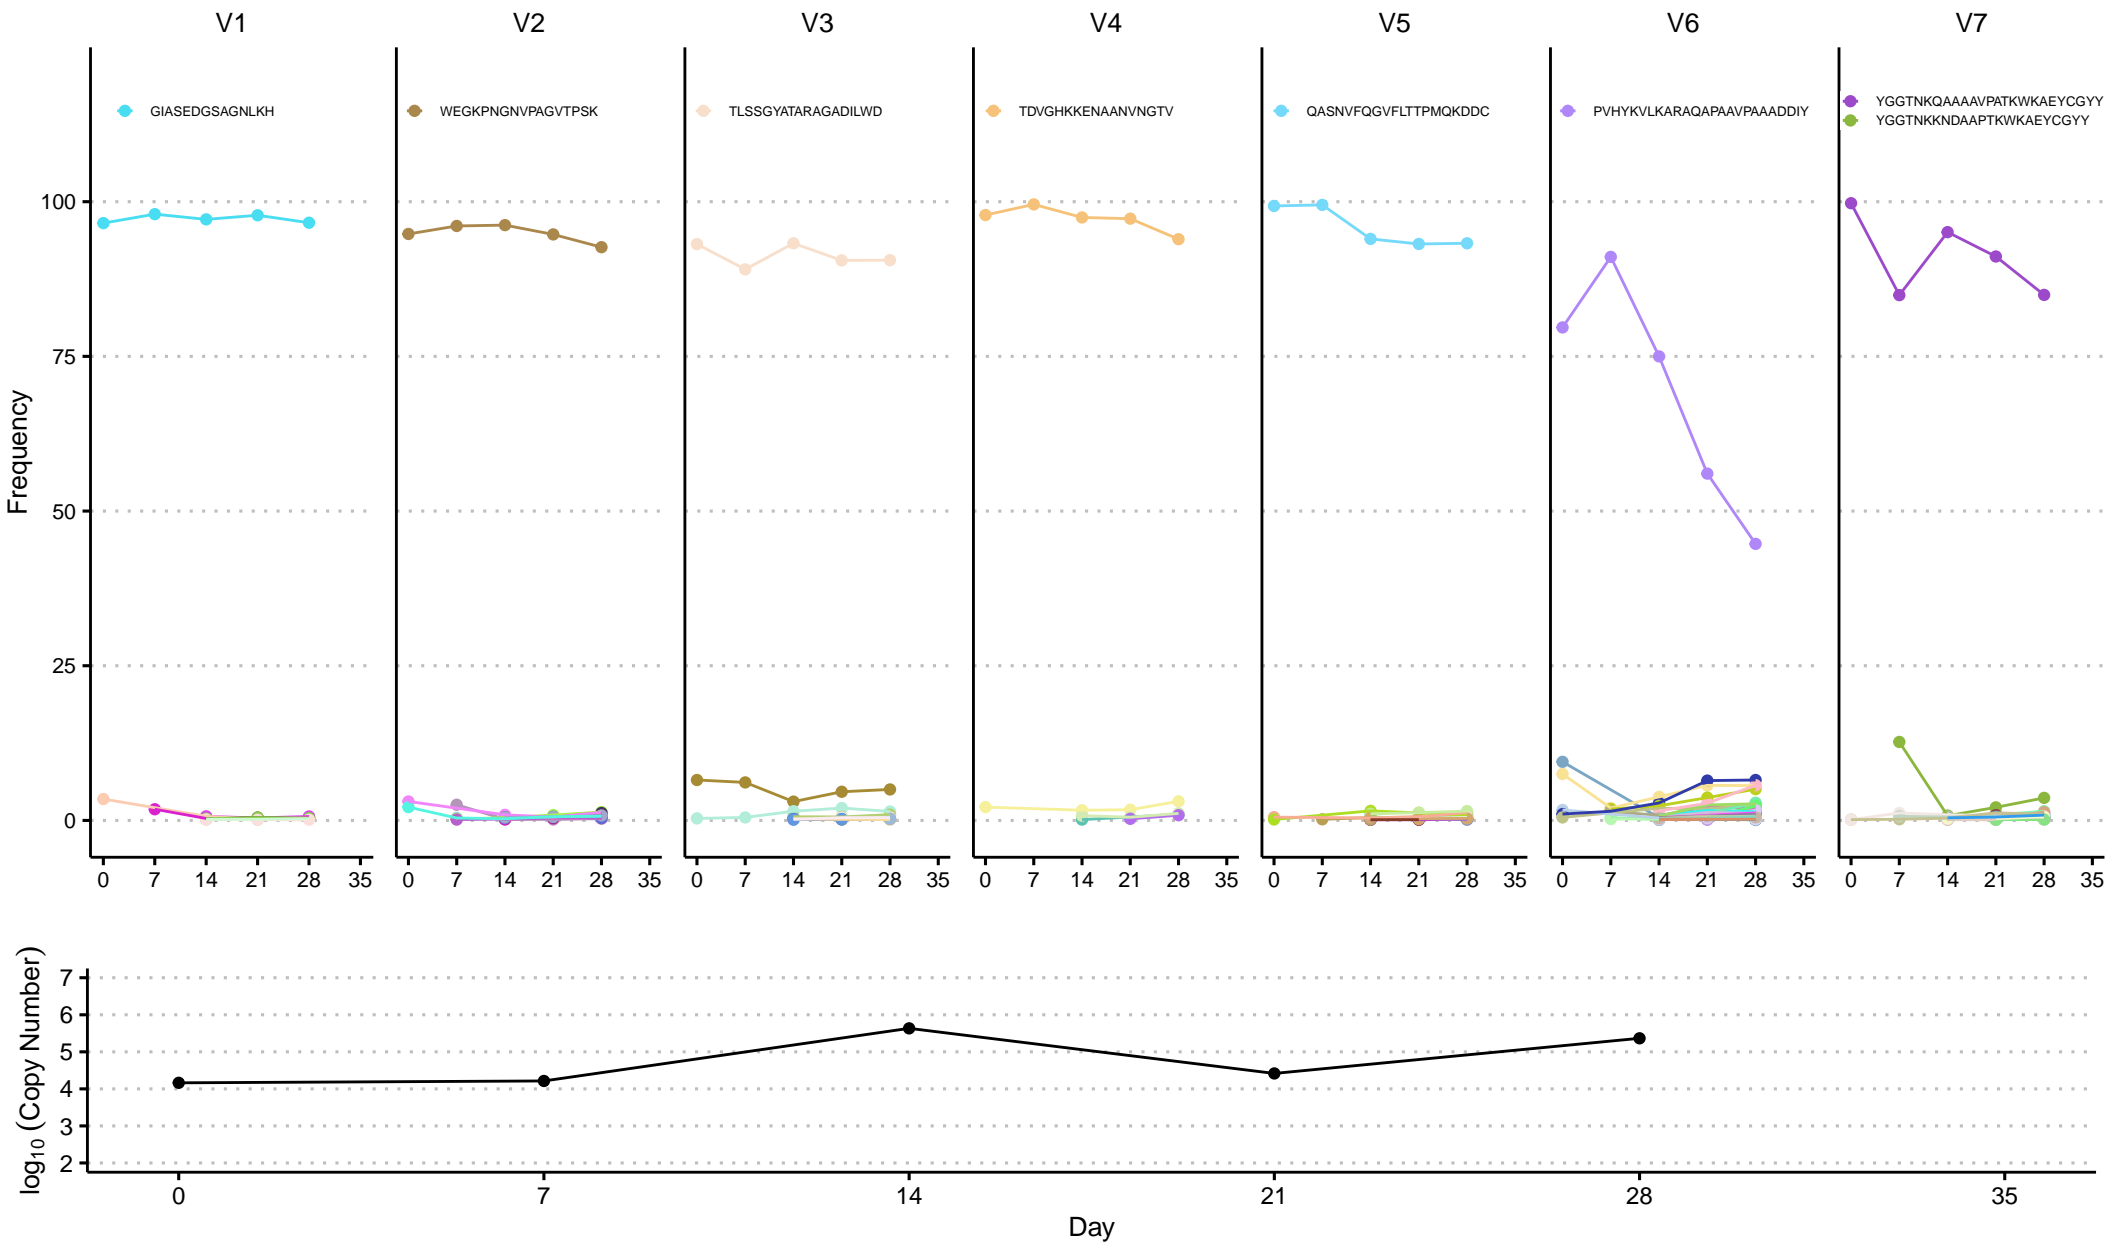



# 7411 – Immunocompetent

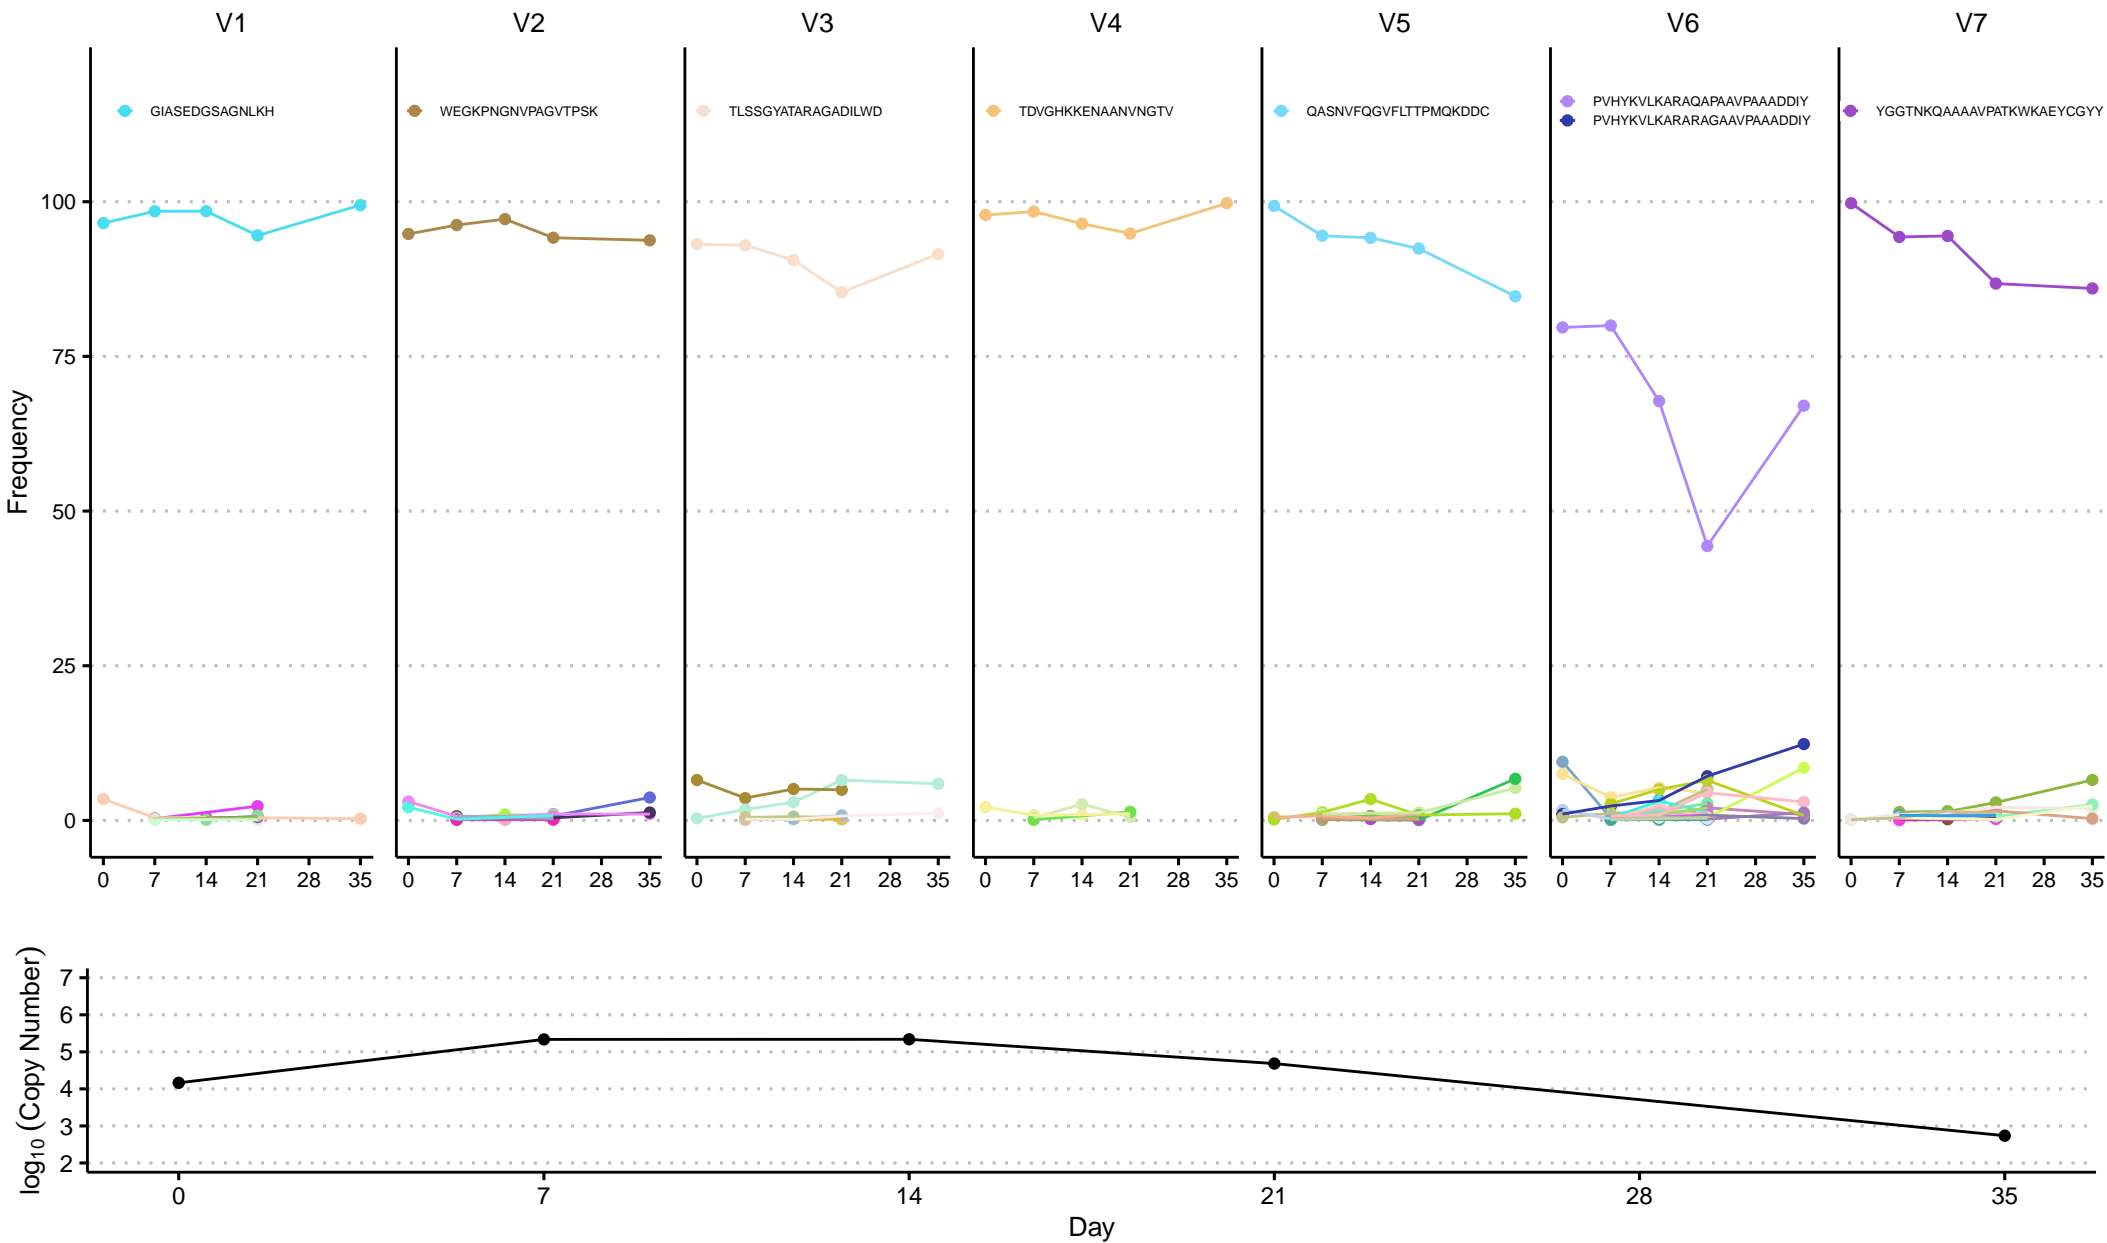

# 7413 – Immunocompetent

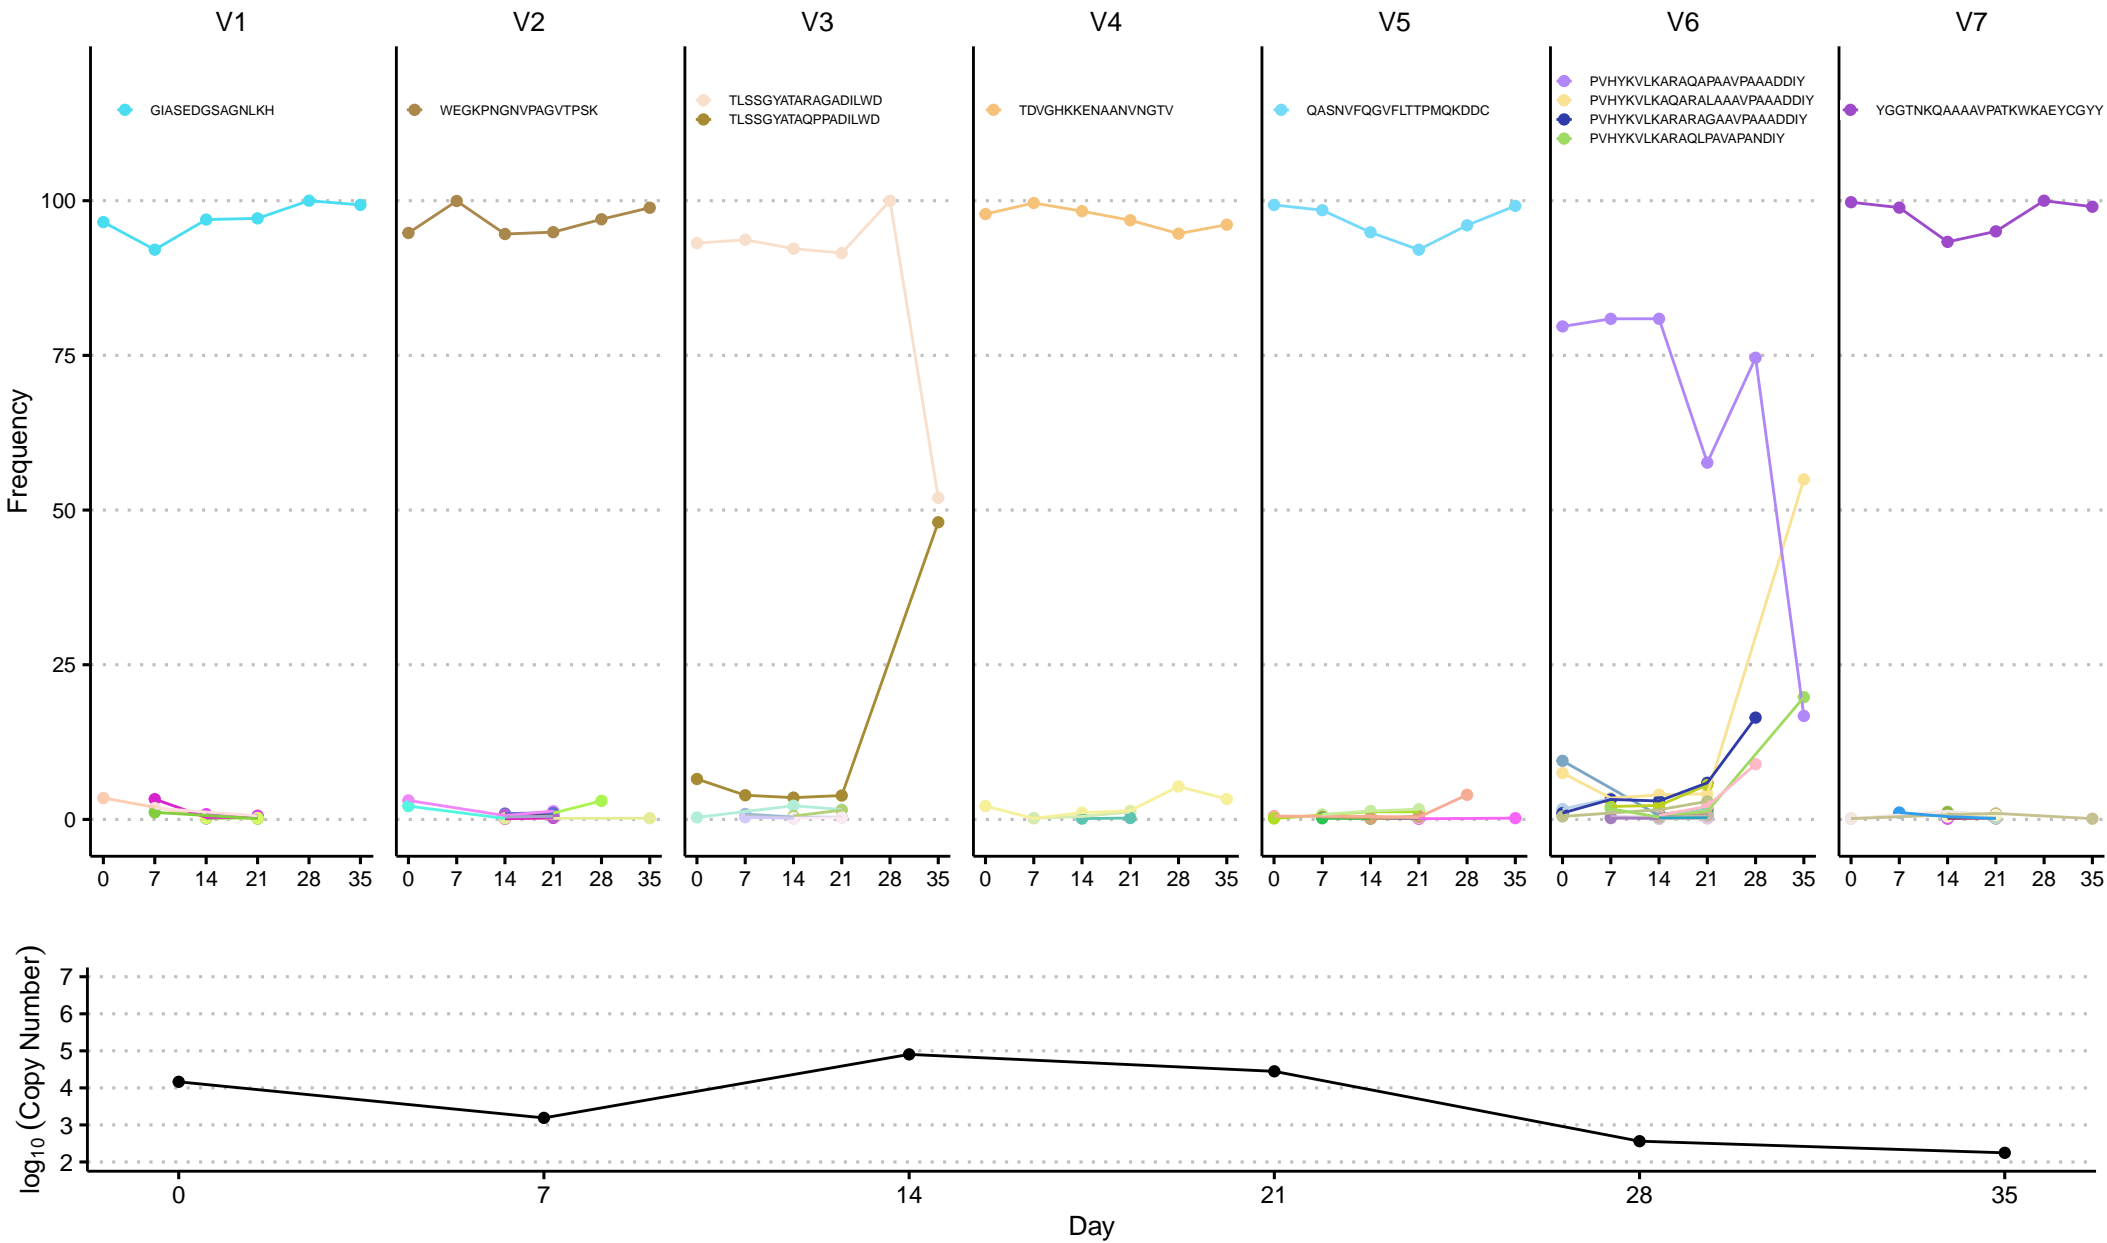

# 7397 – Immunosuppressed

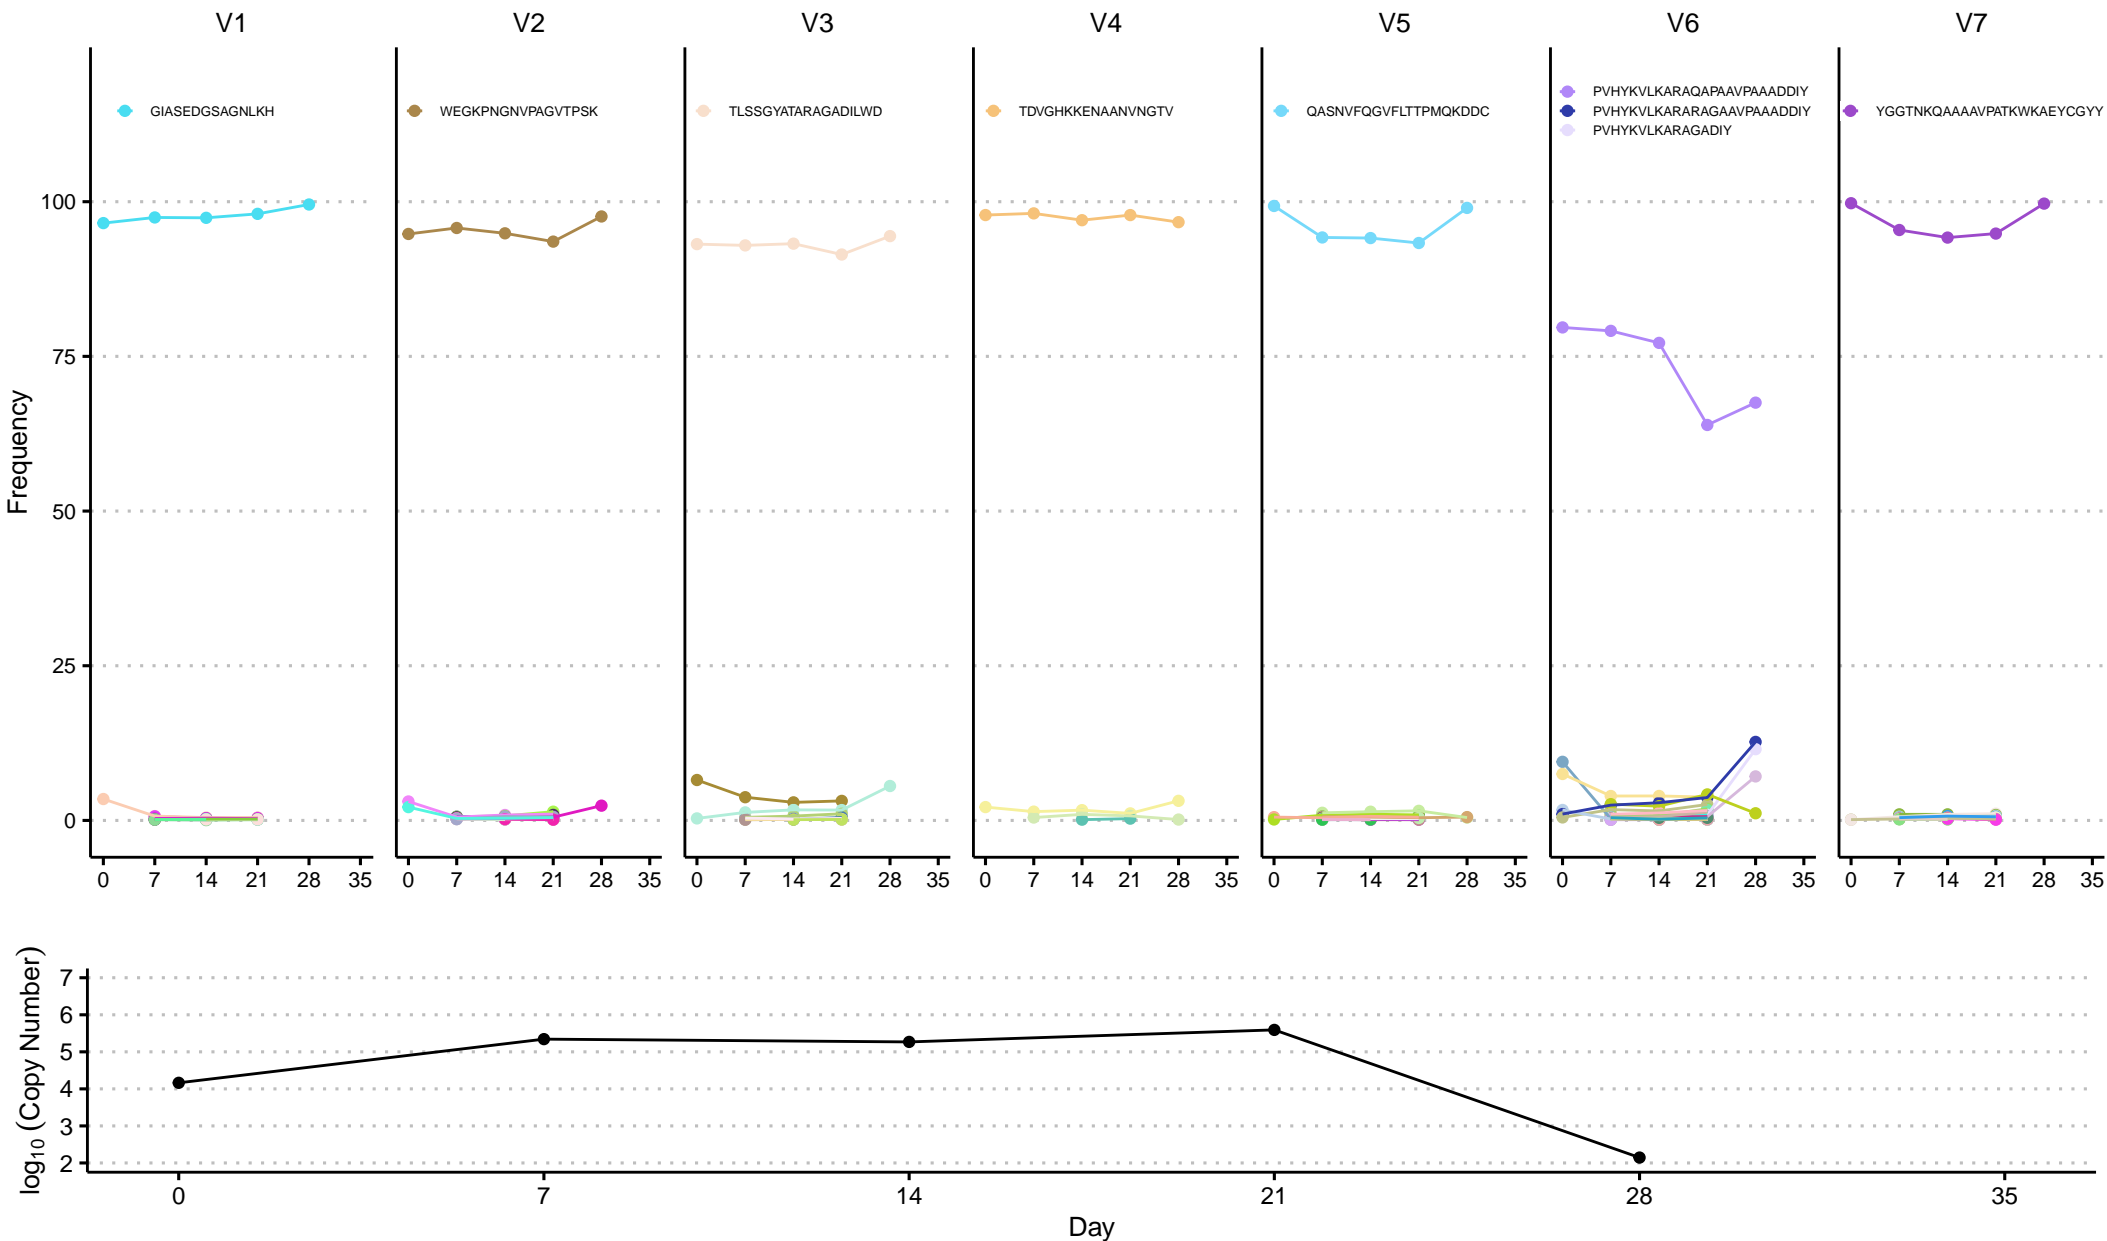

# 7400 – Immunosuppressed

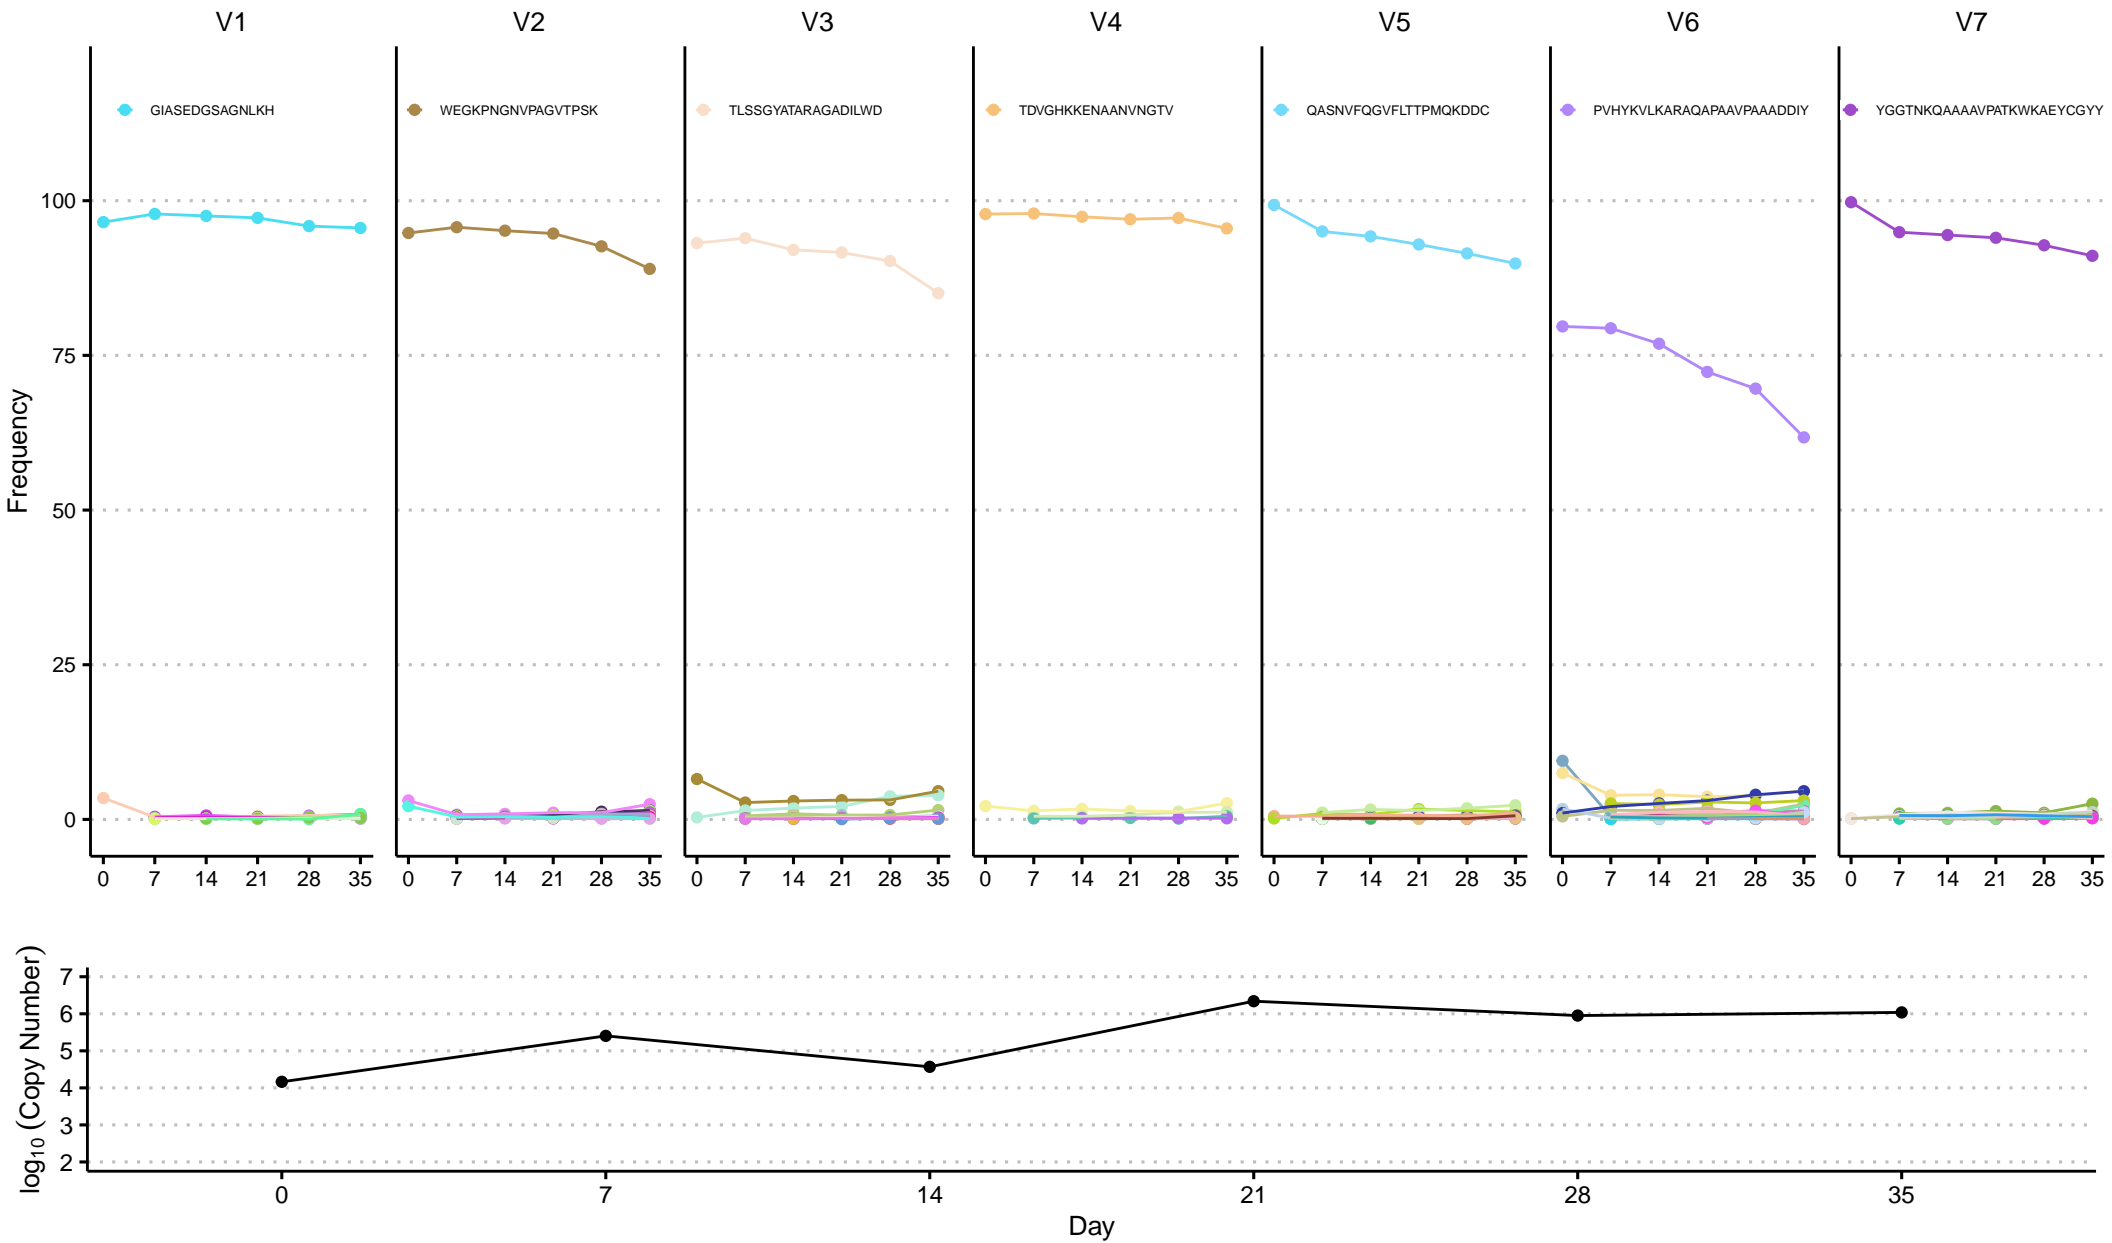

# 7401 – Immunosuppressed

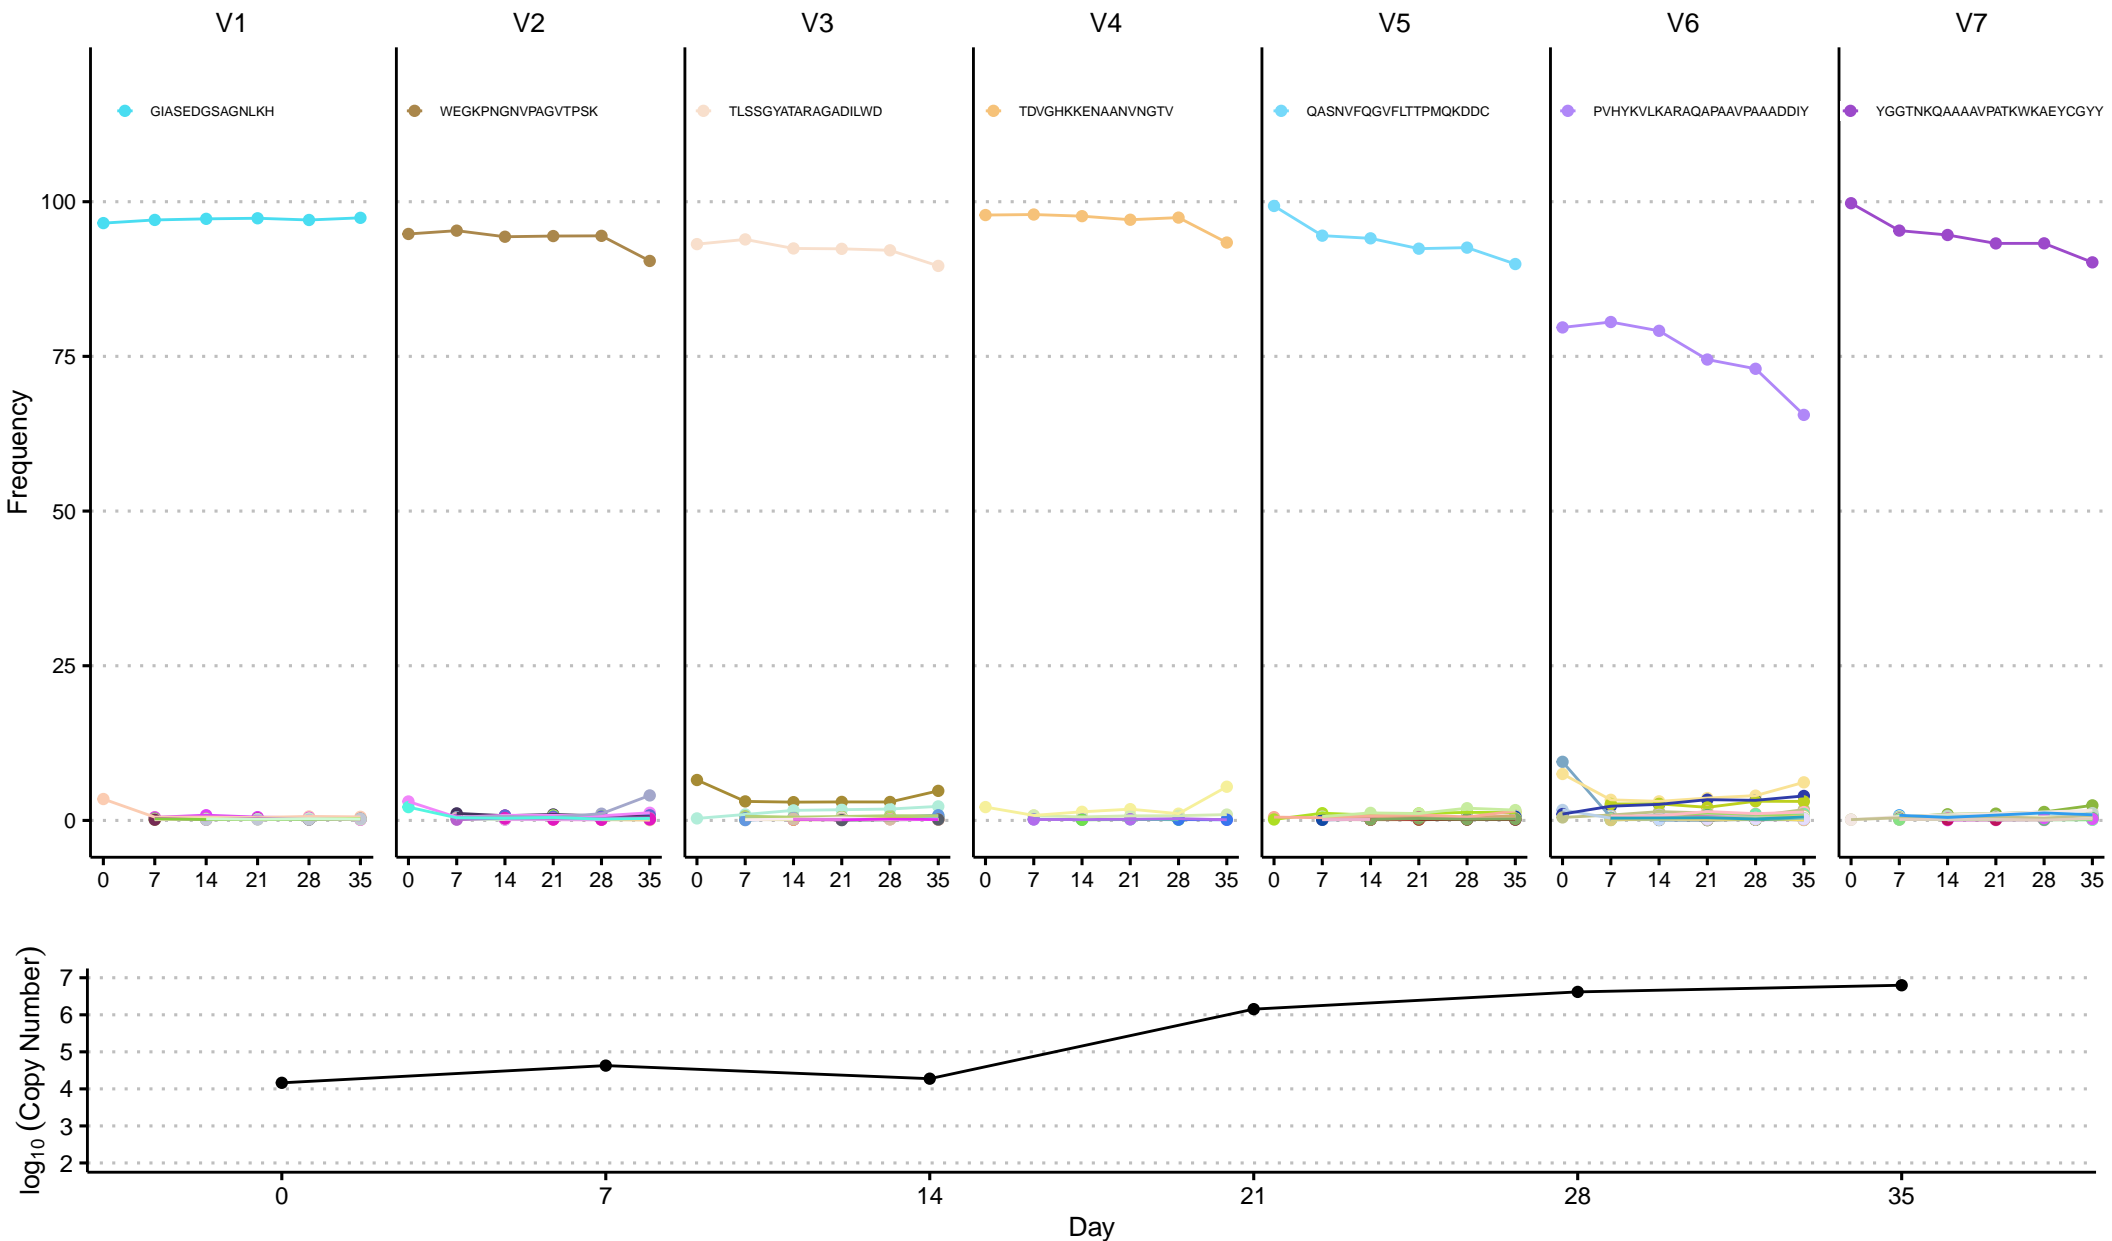



# 7403 – Immunosuppressed

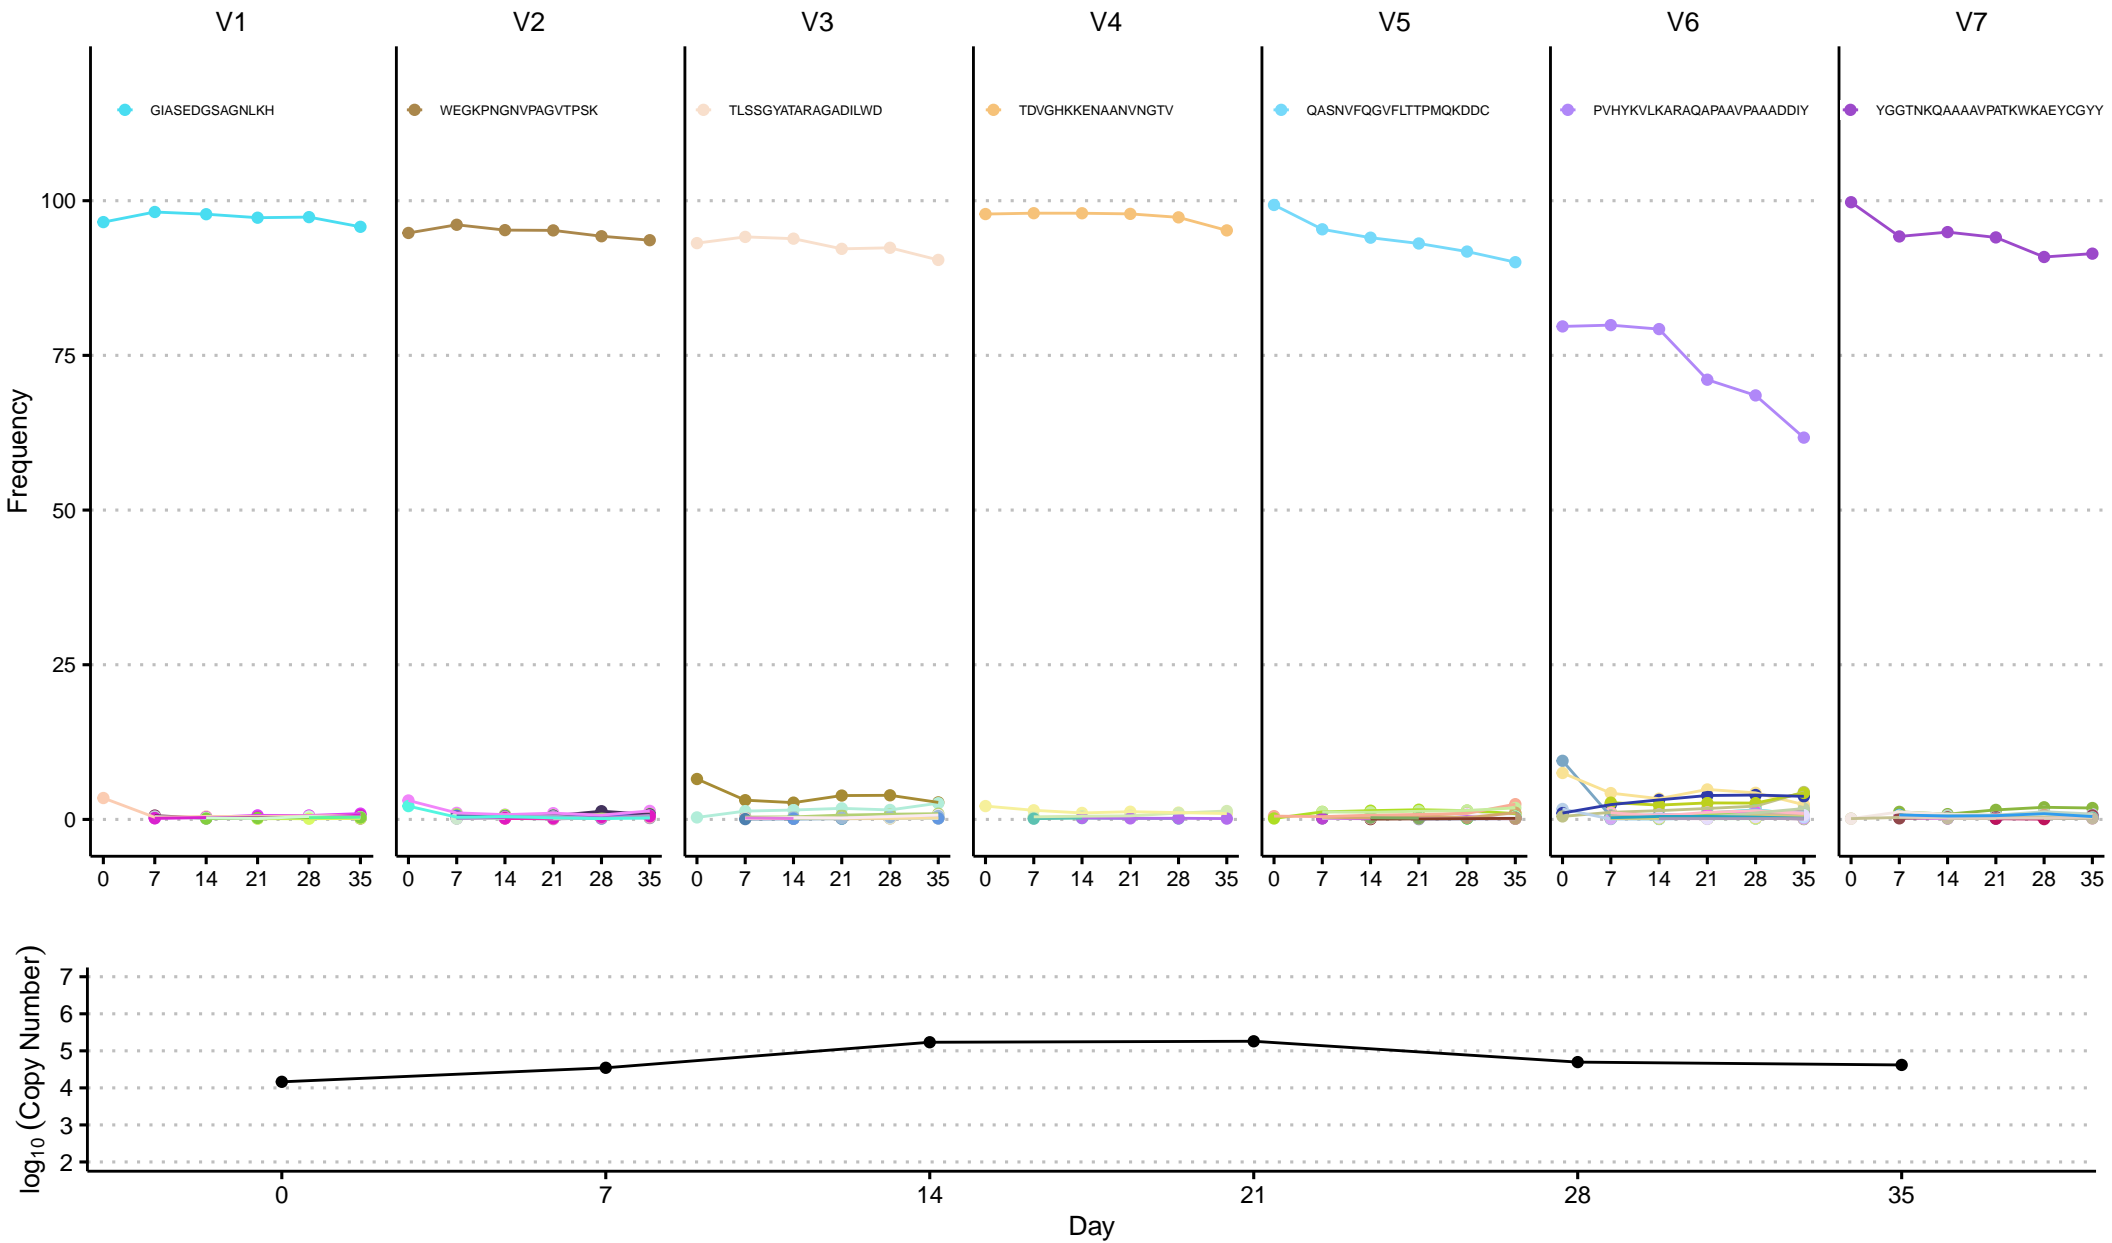

# 7406 – Immunosuppressed

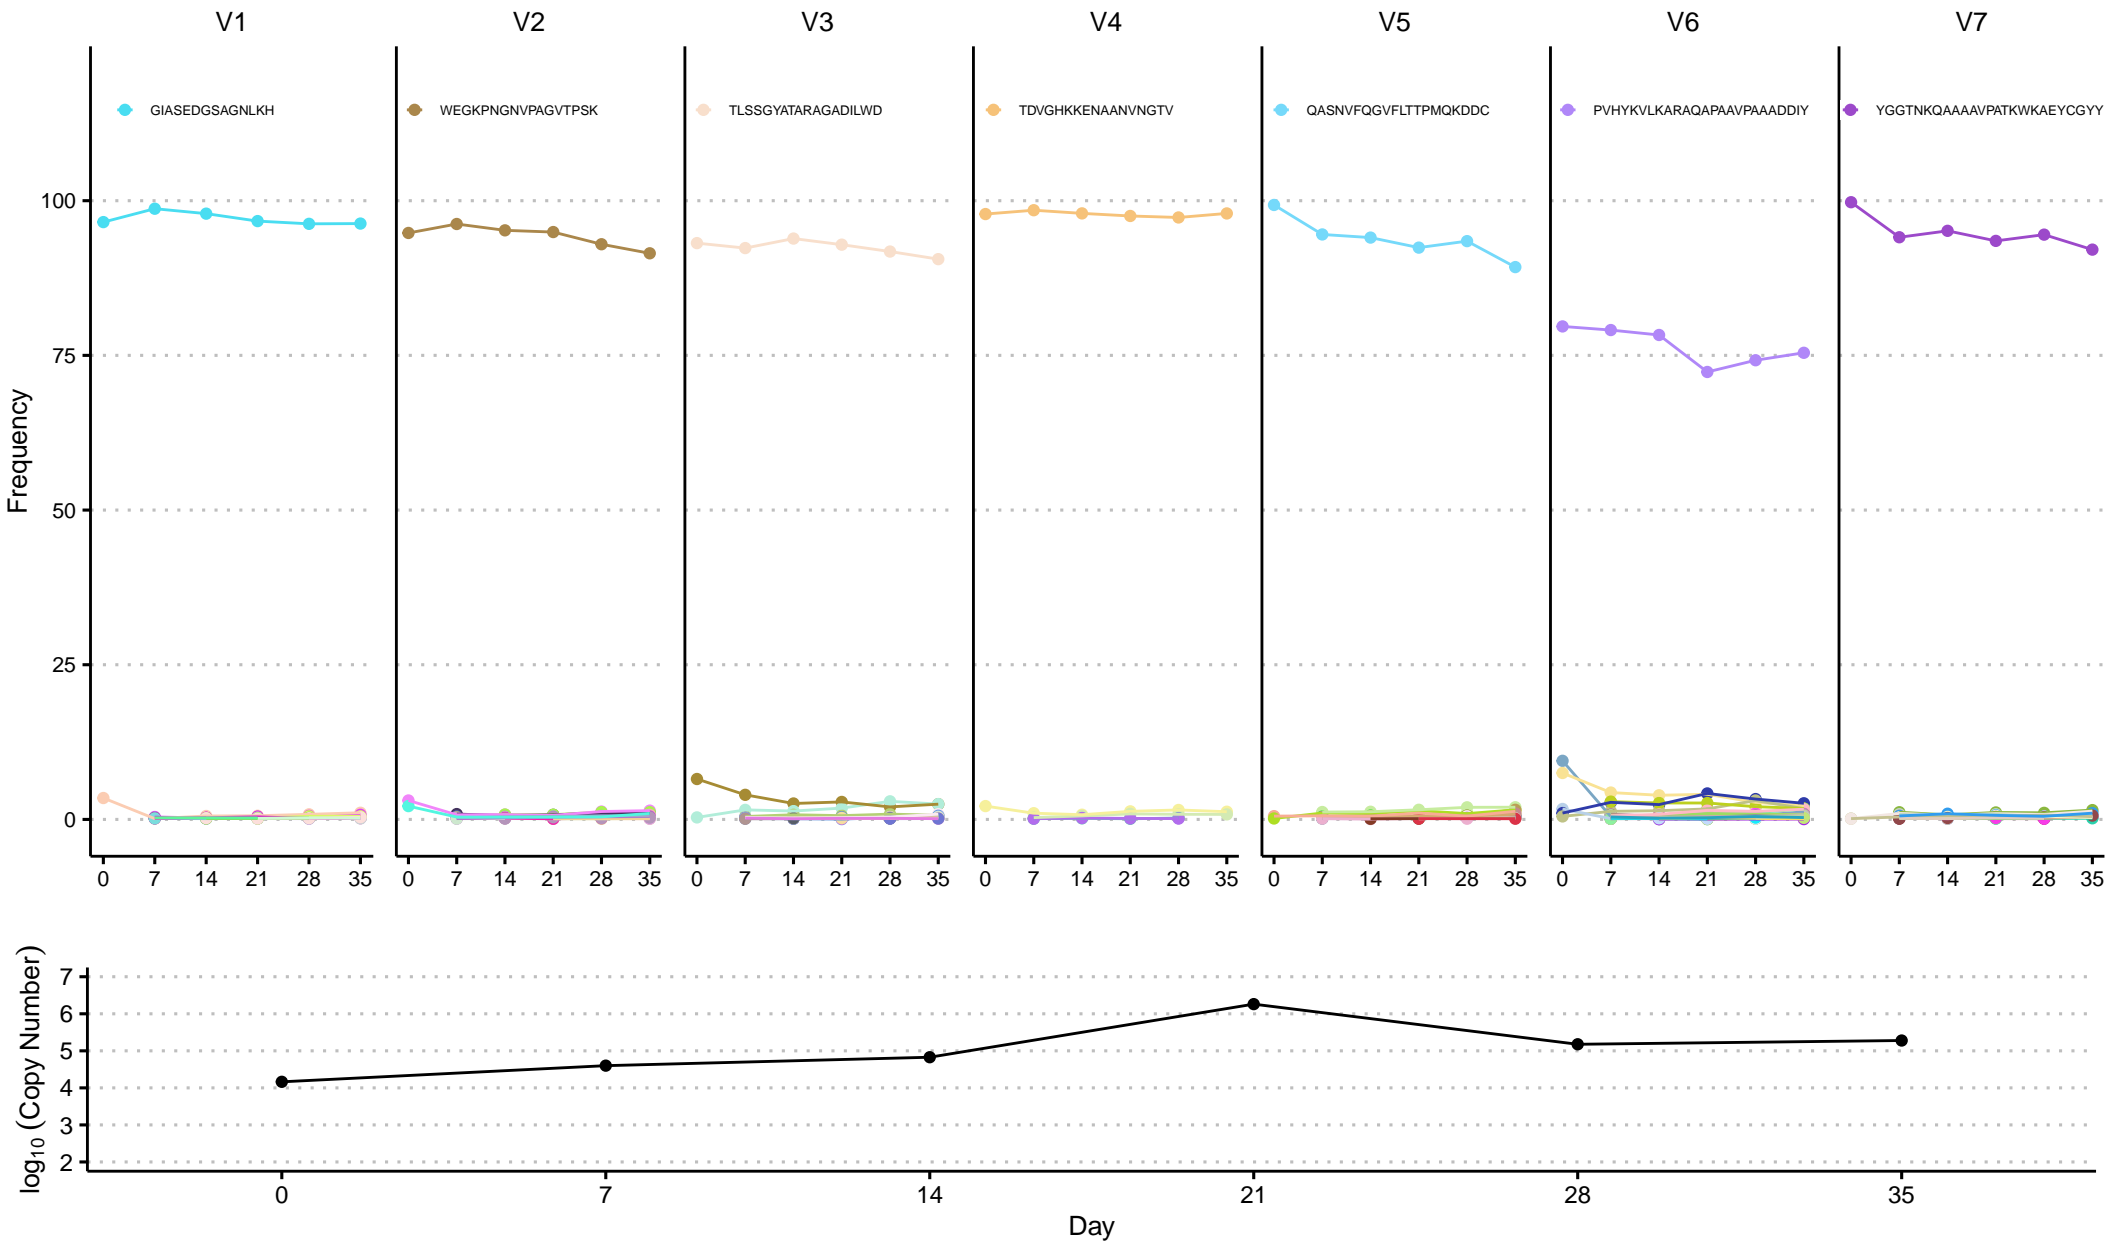

Supplement: pntd.0009753.s006.pdf [file pntd.0009753.s006.pdf]
