# Supplementary material for: Longitudinal TprK profiling of in vivo and in vitro-propagated Treponema pallidum subsp. pallidum reveals accumulation of antigenic variants in absence of immune pressure
Source: PubMed Central journal article supplement (PMC8480903; doi:10.1371/journal.pntd.0009753), 2021-09-07

# Culture A

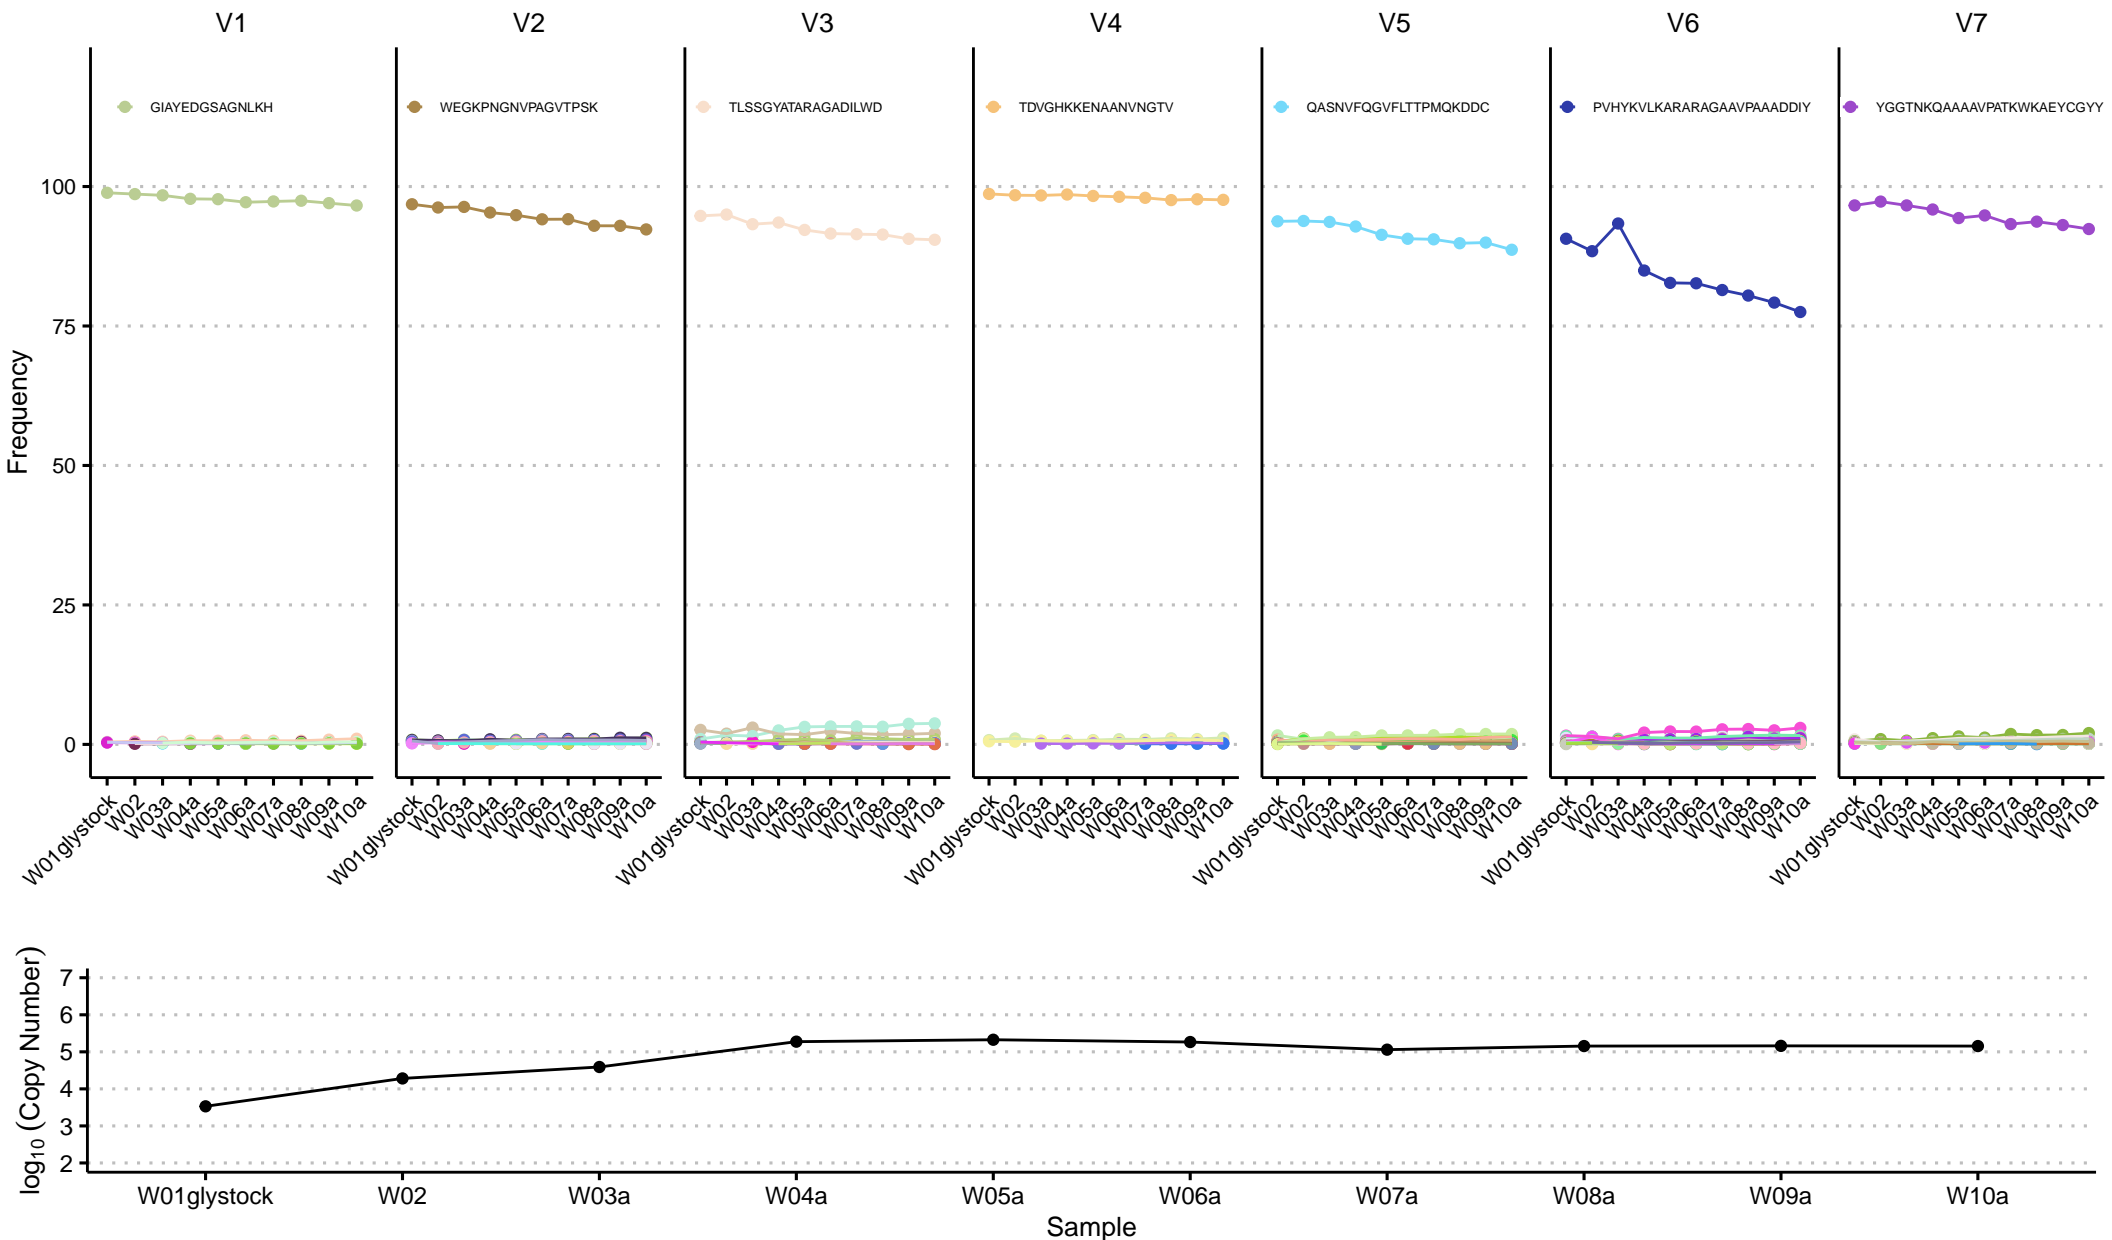

# Culture B

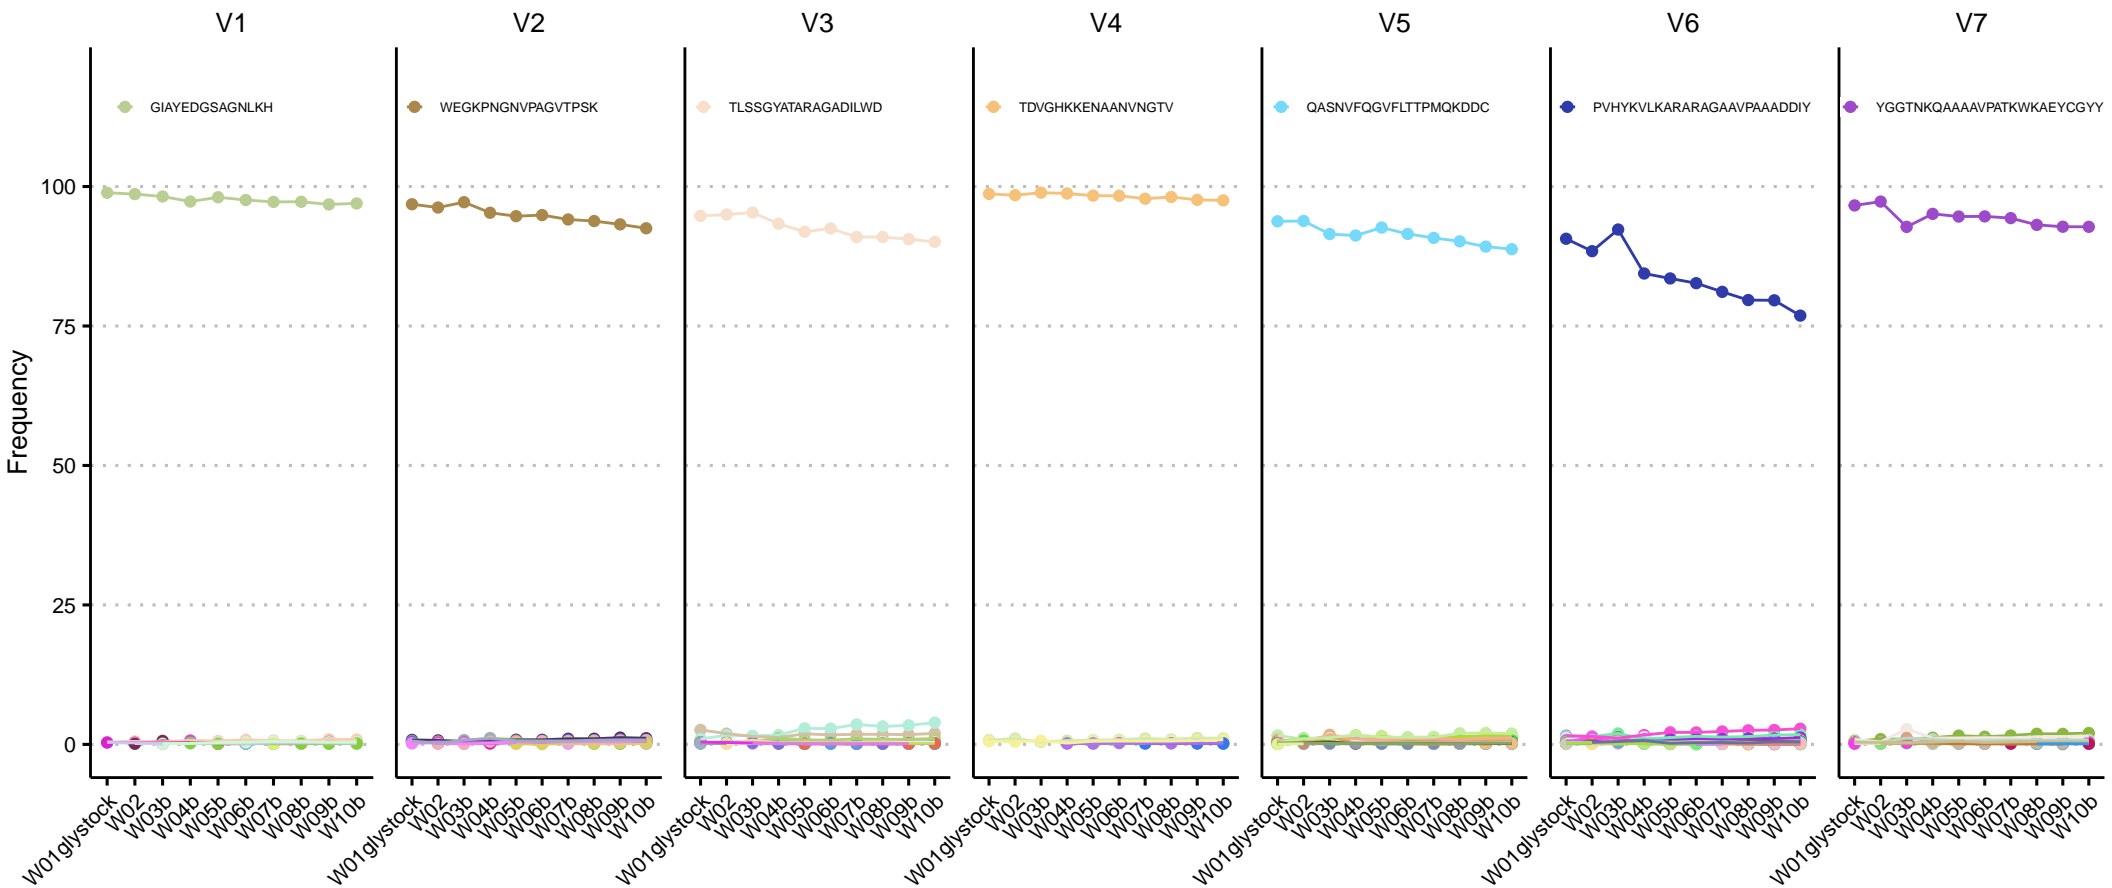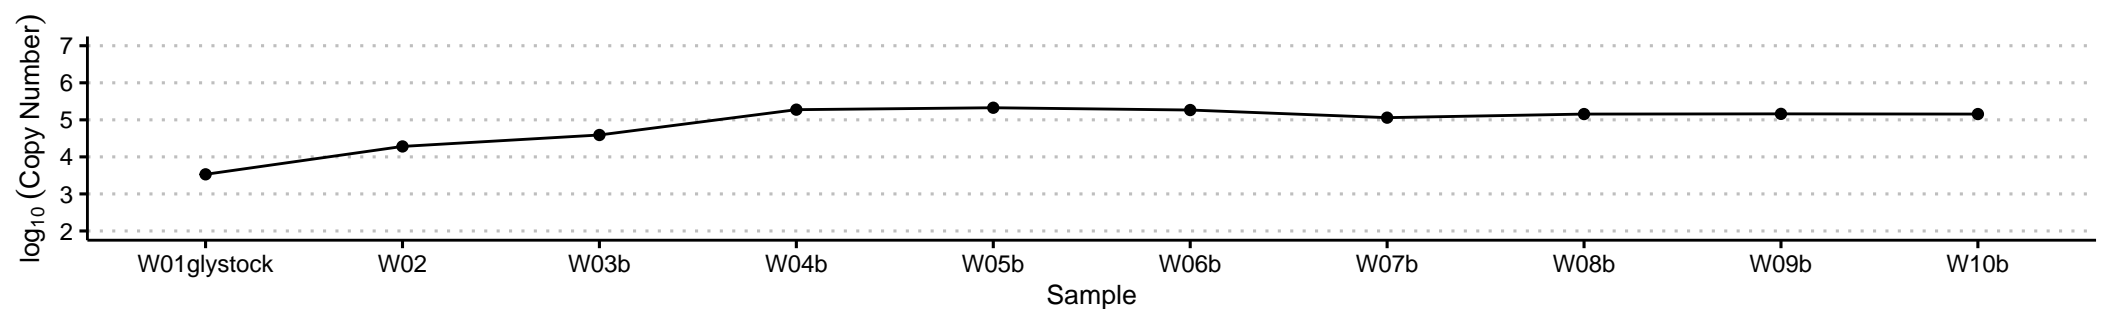

# Rabbit

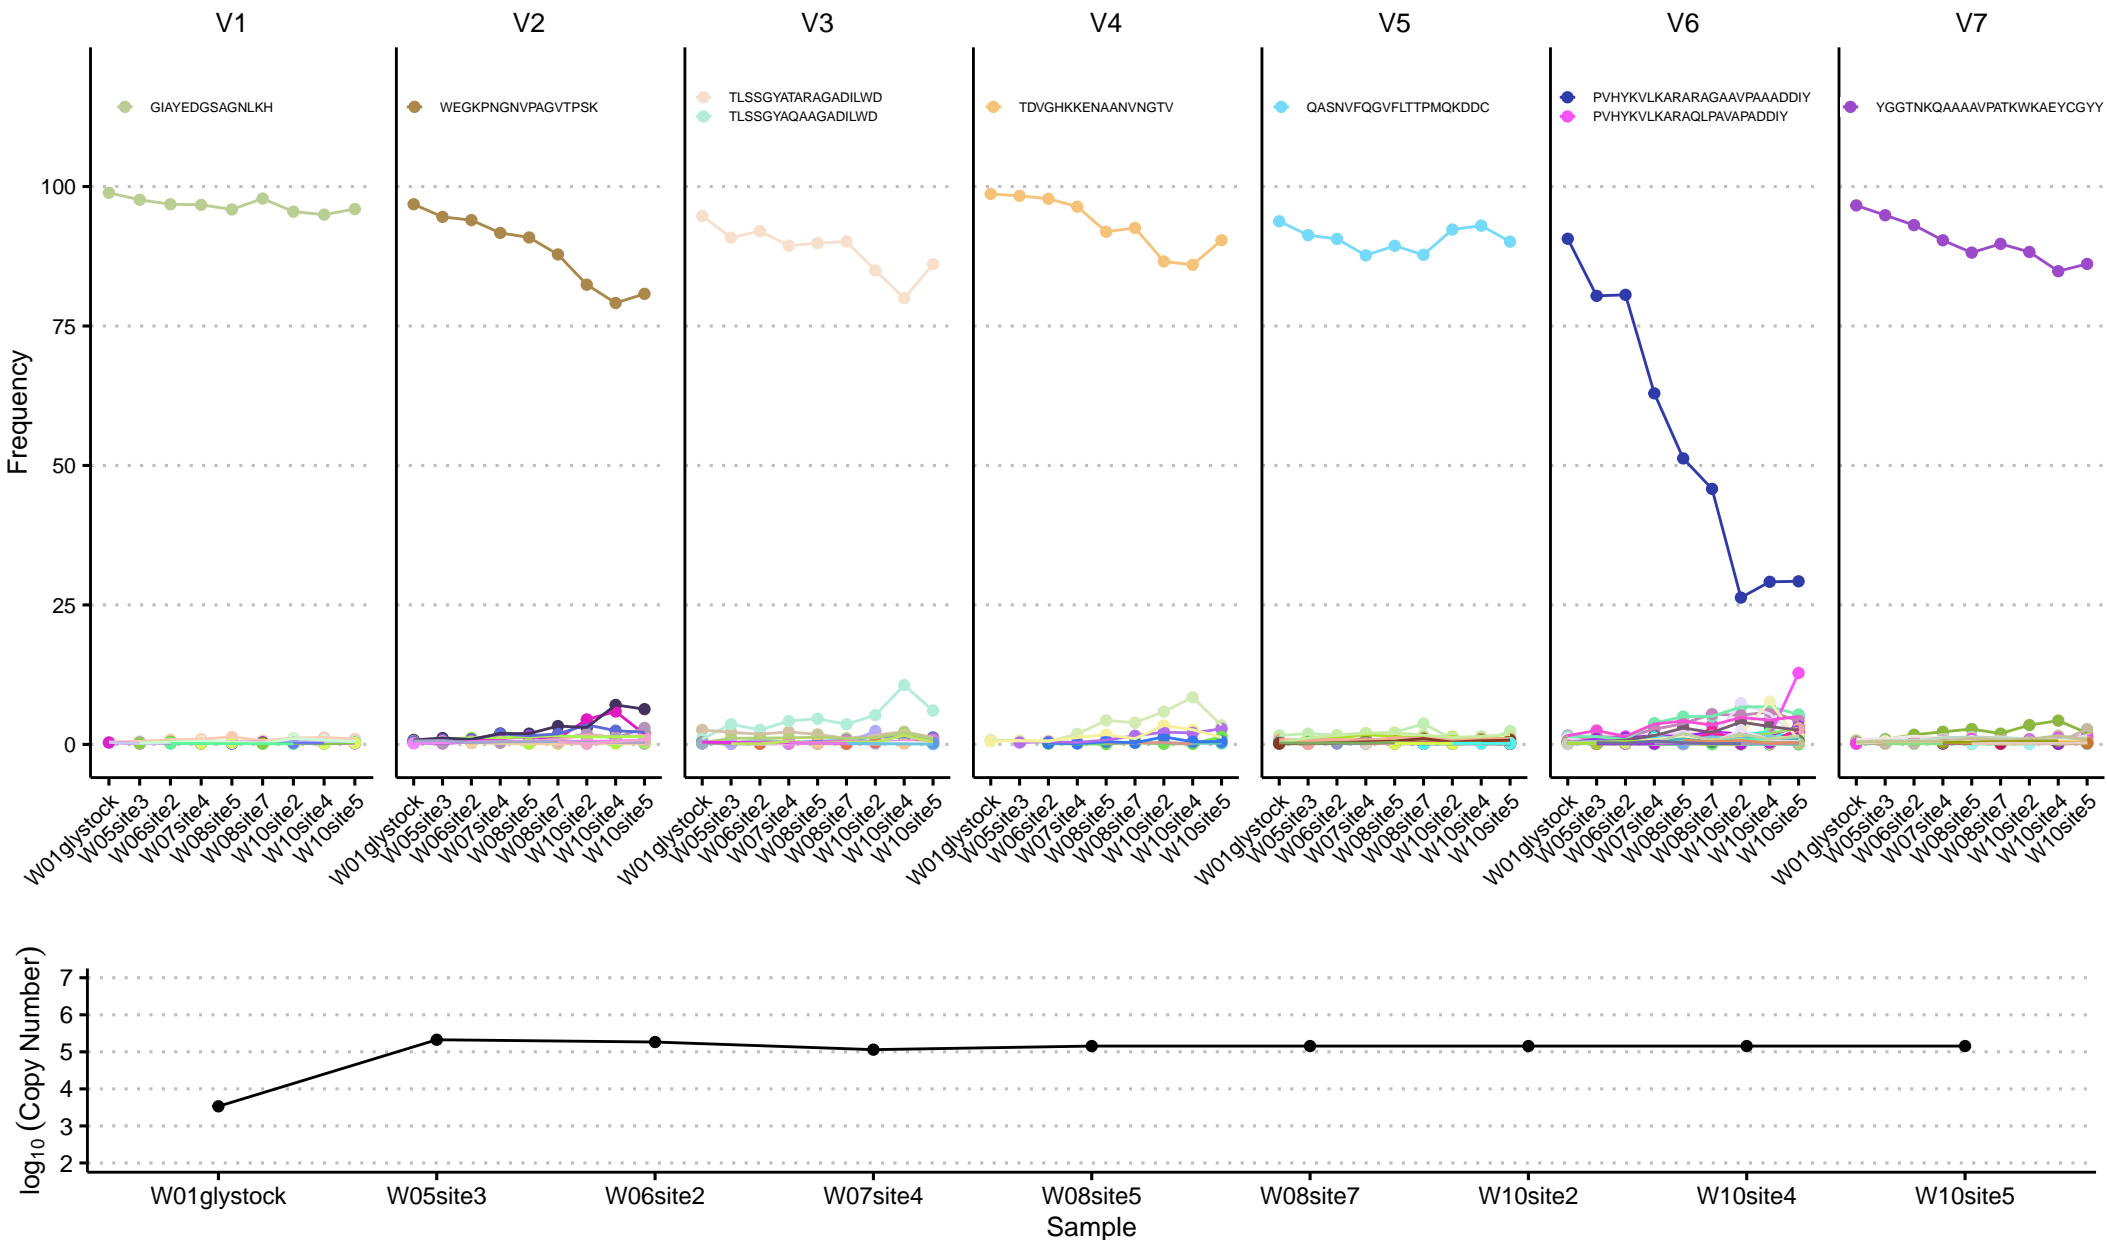

Supplement: pntd.0009753.s007.pdf [file pntd.0009753.s007.pdf]
